# Supplementary material for: Plasma LDL-Cholesterol Level at Admission is Independently Associated with Infarct Size in Patients with ST-Segment Elevation Myocardial Infarction Treated with Primary Percutaneous Coronary Intervention
Source: Springer Nature journal article supplement (doi:10.1007/s40119-019-0126-5), 2019-02-13
Supplement: MOESM1 [file 16469478]

### Baseline characteristics excluded patients

| Variable                                                                   | All patients (n=875) |
|----------------------------------------------------------------------------|----------------------|
| <i>Patients characteristics</i>                                            |                      |
| Age (years)                                                                | 64.2 ± 13.1          |
| Female gender, n (%)                                                       | 220 (25.1)           |
| <i>Cardiovascular risk factors</i>                                         |                      |
| Current smoker, n (%)                                                      | 323 (36.9)           |
| Diabetes mellitus <sup>a</sup> , n (%)                                     | 102 (11.2)           |
| Family history of coronary artery disease <sup>b</sup> , n (%)             | 286 (32.7)           |
| Treated hypercholesterolemia <sup>c</sup> , n (%)                          | 174 (19.9)           |
| Treated hypertension <sup>d</sup> , n (%)                                  | 324 (37.0)           |
| Body mass index (kg/m <sup>2</sup> )                                       | 26.3 ± 4.1           |
| <i>Comorbidities</i>                                                       |                      |
| Previous myocardial infarction, n (%)                                      | 94 (10.7)            |
| Previous PCI, n (%)                                                        | 67 (7.7)             |
| <i>Previous medication use</i>                                             |                      |
| Betablocker, n (%)                                                         | 175 (20.0)           |
| ACE-inhibitor/AT2-antagonist, n (%)                                        | 191 (21.8)           |
| Statin, n (%)                                                              | 173 (19.8)           |
| Thienopyridine, n (%)                                                      | 23 (2.6)             |
| Ascal, n (%)                                                               | 161 (18.4)           |
| <i>Clinical characteristics</i>                                            |                      |
| Left anterior descending artery as culprit artery, n (%)                   | 353 (40.3)           |
| Number of narrowed coronary arteries <sup>e</sup> , n (%)                  |                      |
| 1                                                                          | 316 (36.1)           |
| 2                                                                          | 249 (28.5)           |
| 3                                                                          | 251 (28.7)           |
| Baseline Trombolysis in Myocardial Infarction flow < 2, n (%) <sup>f</sup> | 568 (64.9)           |
| <i>Laboratory results</i>                                                  |                      |
| LDL-cholesterol (mmol/L)                                                   | 3.4 ± 1.0            |
| HDL-cholesterol (mmol/L)                                                   | 1.2 ± 0.4            |
| Triglycerides (mmol/L)                                                     | 1.8 ± 1.4            |
| Total cholesterol (mmol/L)                                                 | 5.2 ± 1.2            |

Data are expressed as number (%) or mean ± standard deviation.

<sup>a</sup>Use of glucose lowering agents or known with glucose > 6.9 mmol/L.

<sup>b</sup>First degree relative < 60 year with cardiovascular disease.

<sup>c</sup>Explicitly stated in patient history or previous pharmacologic treatment.

<sup>d</sup>Explicitly stated in patient history or previous pharmacologic treatment.

<sup>e</sup>A narrowed coronary artery was defined as a stenosis of  $\geq 50\%$  on baseline coronary angiogram.

<sup>f</sup>Baseline Thrombolysis In Myocardial Infarction (TIMI) flow is the TIMI flow before primary PCI in the culprit vessel.
